# Supplementary material for: Vaccine genetics of IGHV1-2 VRC01-class broadly neutralizing antibody precursor naïve human B cells
Source: PubMed Central journal article supplement (PMC8421370; doi:10.1038/s41541-021-00376-7), 2021-09-06
Supplement: 41541_2021_376_MOESM1_ESM.pdf [file 41541_2021_376_MOESM1_ESM.pdf]

## SUPPLEMENTARY FIGURES

### Gating Strategy

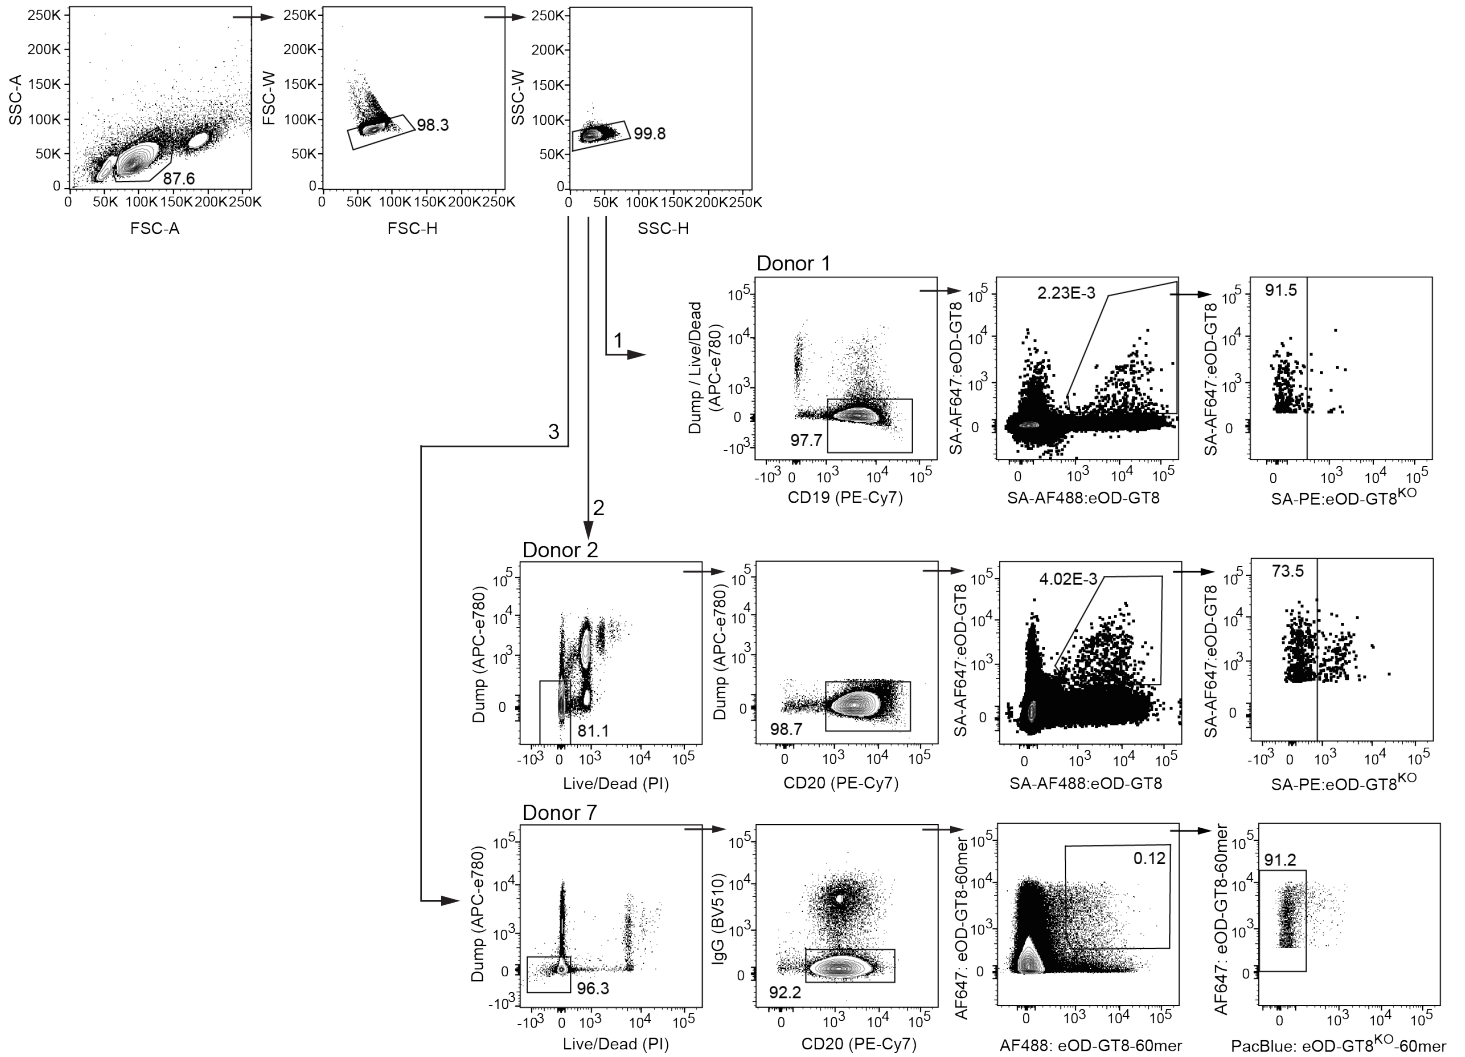

### Supplementary Figure 1. Sort gating strategy

Complete gating strategies for sorted samples. Following the common Lymphocyte/Singlet/Singlet gating (example from donor 1 sample), strategies differed slightly depending on the sample. Samples dated according to strategy 1: donors 1, 4, 8, 9; Samples gated according to strategy 2: donors 2, 3, 5, 6; Samples gated according to strategy 3: donor 7.

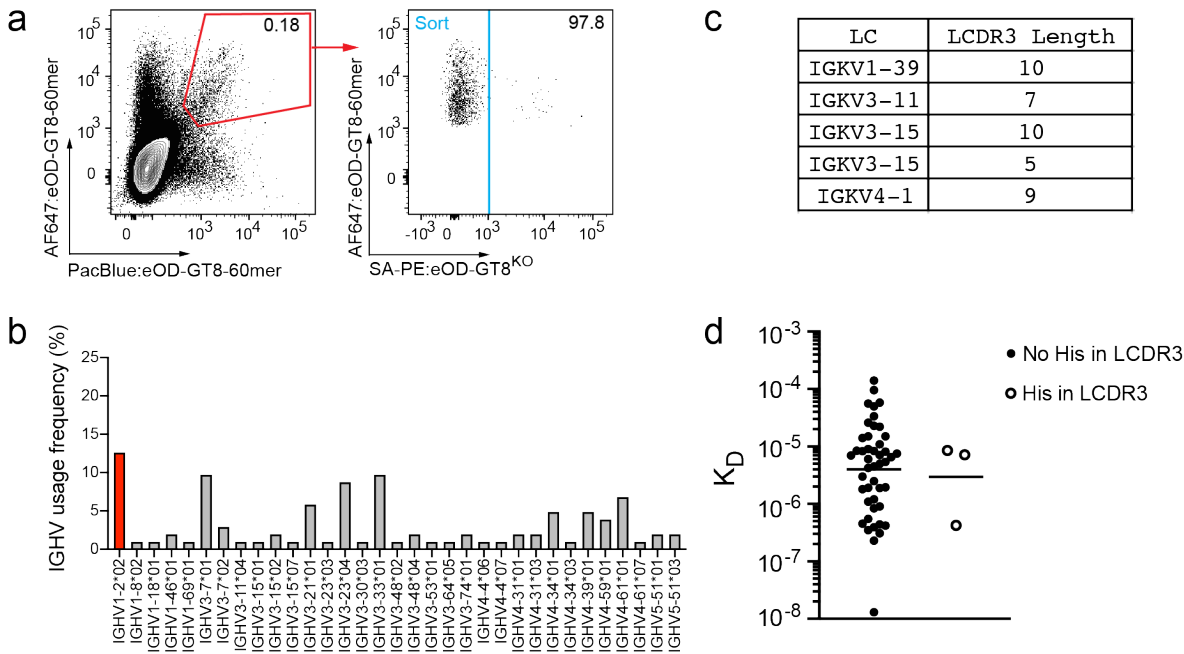

### Supplementary Figure 2. Single cell sorting using eOD-GT8-60mer probes.

B cells enriched from healthy donor 8 PBMCs were stained with eOD-GT8-60mer probes directly conjugated with fluorophores and single cell sorted for of IgG<sup>neg</sup> / eOD-GT8-60mer<sup>++</sup> eOD-GT8<sup>KO</sup>-60mer<sup>neg</sup> B cells.

**(a)** Flow cytometry of probe-stained B cells. Gated on IgG<sup>neg</sup> CD19<sup>+</sup> B cells.

**(b)** IGHV gene usage distribution among sequenced B cells (n=103).

**(c)** Successfully recovered LC sequences paired with BCRs expressing IGHV1-2 HC. Only one LC has a short 5-AA Lcdr3.

**(d)** Monomeric dissociation constants for several expressed VRC01-class naïve BCR Fabs binding to eOD-GT8. The BCRs were identified using eOD-GT8 tetramer probes in previous studies<sup>23,36</sup>. Three Abs have an Lcdr3 with a histidine residue. Geometric mean is shown.

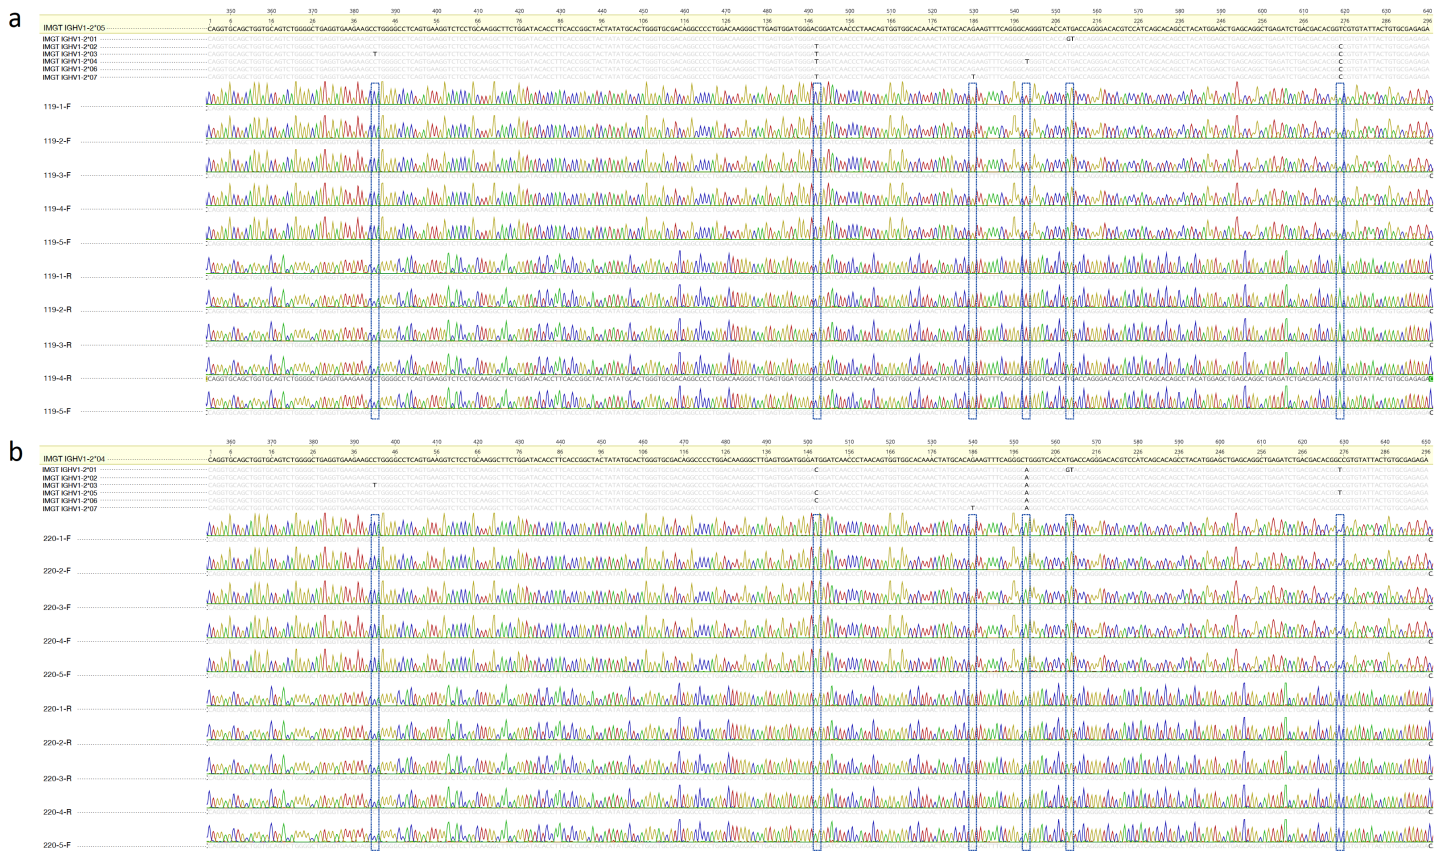

**Supplementary Figure 3. IGHV1-2 PCR, cloning, and Sanger sequencing confirm allele genotypes in donors 1 and 9**

Sanger chromatograms representing five sequenced clones from targeted IGHV1-2 gene PCR of genomic DNA in donors 9 (**a**) and 1 (**b**). All clones were sequenced from both the forward and reverse directions to fully span the entirety of the IGHV1-2 coding region. Donor sequences are aligned to all known IGHV1-2 alleles, and SNPs differentiating either \*05 or \*04 from all other alleles are indicated (dashed boxes). As shown, all sequences within donor 9 (**a**) and donor 1 (**b**) matched \*05 and \*04, respectively, with 100% sequence identity.

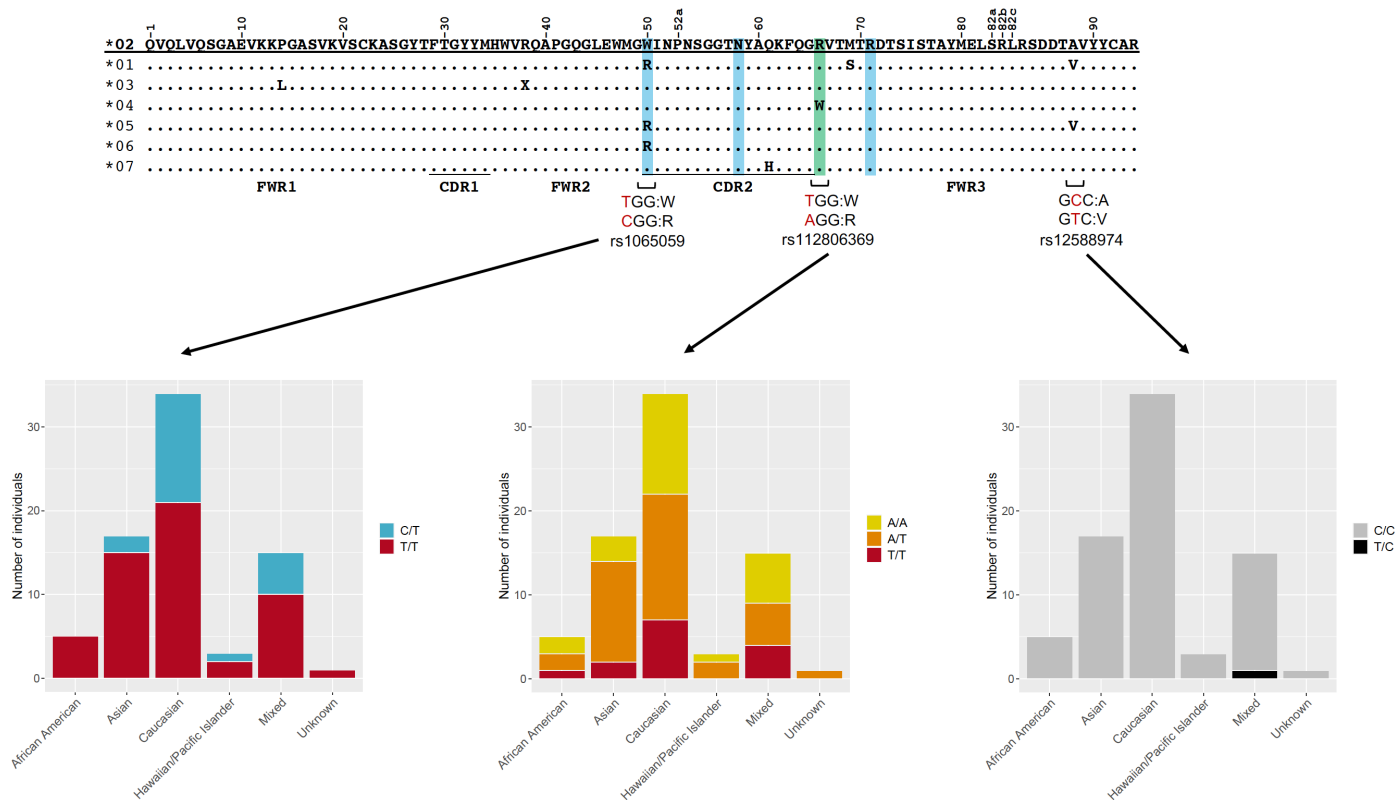

#### Supplementary Figure 4. IGHV1-2 SNP genotypes inferred from RNA-seq data

AA sequence alignment of the seven known IGHV1-2 alleles, as in Fig. 4a. AA positions represented by SNPs (rs1065059, rs112806369, and rs12588974) present in the RNA-seq data are indicated. Stacked bar plots showing the distribution of inferred SNP genotypes within each population subgroup (n=75; African American, n=5; Asian, n=17; Caucasian, n=34; Hawaiian/Pacific Islander, n=3; Mixed ethnicity, n=15; Unknown, n=1).

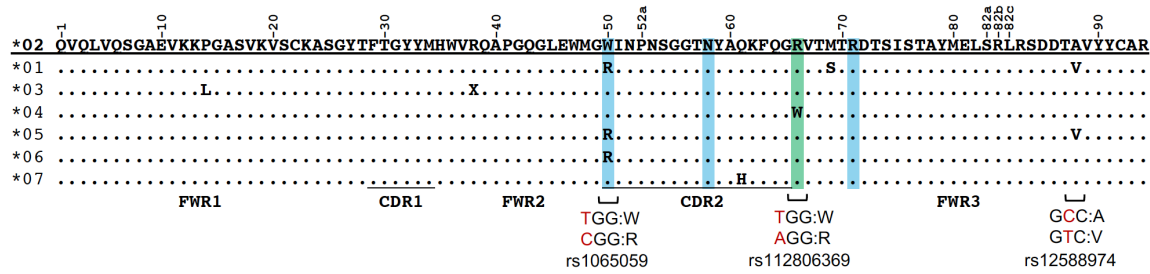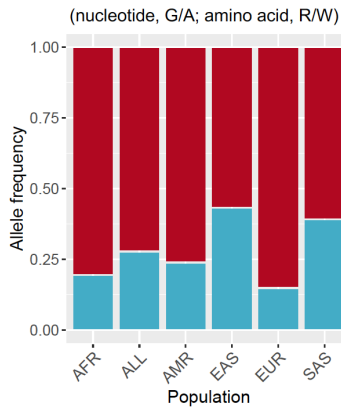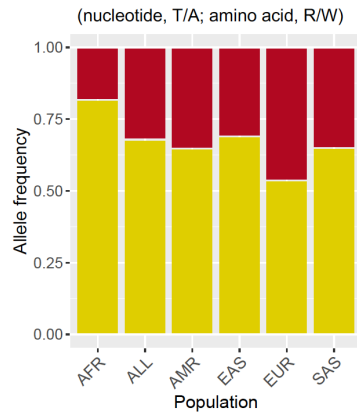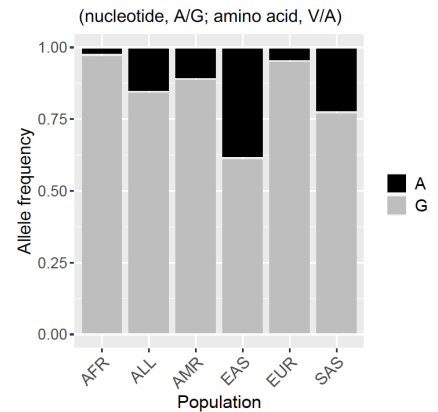

### Supplementary Figure 5. IGHV1-2 SNP allele frequency distributions in human subpopulations represented in 1000 Genomes Project data

AA sequence alignment of the seven known IGHV1-2 alleles, as in Fig. 4a. AA positions represented by SNPs rs1065059, rs112806369, and rs12588974 are indicated. Reverse complement bases for each SNP are provided; the 1KGP variant call set contains complement alleles to reflect the fact that IGHV1-2 is found in reverse orientation (3'-5') in the genome reference assembly. Stacked bar charts displaying the allele frequencies at each SNP within the overall population, as well as five broad human subpopulations are shown (All, n=5,008; AFR, African, n=1,322; AMR, American, n=694; EAS, East Asian, n=1,008; EUR, European, n=1,006; SAS, South Asian, n=978).

**SUPPLEMENTARY TABLES**

|       | IGHV       | IGHD            | IGHJ     | CDRH3                    | IGKV         | IGKJ     | CDRL3   | HC GenBank | LC GenBank |
|-------|------------|-----------------|----------|--------------------------|--------------|----------|---------|------------|------------|
| D1-01 | IGHV1-2*04 | IGHD4-17*01     | IGHJ2*01 | CARADYGDYWFYFDLW         | IGKV1-5*01   | IGKJ1*01 | CQYETF  | MZ594686   | MZ594787   |
| D1-02 | IGHV1-2*04 | IGHD1-14*01 ORF | IGHJ5*02 | CARATRGRHFSFDPW          | IGKV3-20*01  | IGKJ2*01 | CQYETF  | MZ594687   | MZ594788   |
| D1-03 | IGHV1-2*04 | IGHD6-13*01     | IGHJ2*01 | CARDRGNSSSWHYFDFLW       | IGKV1D-33*01 | IGKJ4*01 | CQYDSF  | MZ594688   | MZ594789   |
| D1-04 | IGHV1-2*04 | IGHD6-19*01     | IGHJ4*02 | CARDRRLGSGWYFDYW         | IGKV1D-33*01 | IGKJ3*01 | CQYKTF  | MZ594689   | MZ594790   |
| D1-05 | IGHV1-2*04 | IGHD4-17*01     | IGHJ3*02 | CARDYGDPPHAFDIW          | IGKV3-20*01  | IGKJ2*01 | CQYDTF  | MZ594690   | MZ594791   |
| D1-06 | IGHV1-2*04 | IGHD3-22*01     | IGHJ4*02 | CAREDDSSSGYFYW           | IGKV3-20*01  | IGKJ2*01 | CQYQTF  | MZ594691   | MZ594792   |
| D1-07 | IGHV1-2*04 | IGHD3-10*02     | IGHJ3*02 | CAREYVYDRGKAGAFDIW       | IGKV3-20*01  | IGKJ4*01 | CQYDTF  | MZ594692   | MZ594793   |
| D1-08 | IGHV1-2*04 | IGHD1-26*01     | IGHJ4*03 | CARGEYSGSYAIW            | IGKV1-5*01   | IGKJ1*01 | CQPGTF  | MZ594693   | MZ594794   |
| D1-09 | IGHV1-2*04 | IGHD2-15*01     | IGHJ4*02 | CARGYEAATYDYW            | IGKV3-20*01  | IGKJ2*01 | CQYQTF  | MZ594694   | MZ594795   |
| D1-10 | IGHV1-2*04 | IGHD4-17*01     | IGHJ4*02 | CARRSRDYGANVGYDYW        | IGKV3-20*01  | IGKJ2*01 | CQYEF   | MZ594695   | MZ594796   |
| D1-11 | IGHV1-2*04 | IGHD6-19*01     | IGHJ5*02 | CARSRHSSASAFDPW          | IGKV1D-33*01 | IGKJ2*01 | CQYDTF  | MZ594696   | MZ594797   |
| D1-12 | IGHV1-2*04 | IGHD6-19*01     | IGHJ4*02 | CARSTEDSSGWIY            | IGKV1-5*01   | IGKJ4*01 | CQHYGF  | MZ594697   | MZ594798   |
| D1-13 | IGHV1-2*04 | IGHD2-2*01      | IGHJ3*02 | CARTSRLGDADFIDW          | IGKV1-5*01   | IGKJ3*01 | CQYETF  | MZ594698   | MZ594799   |
| D1-14 | IGHV1-2*04 | IGHD2-2*01      | IGHJ3*02 | CARVCSSTSCYGAFFDIW       | IGKV3-15*01  | IGKJ3*01 | CQYNTF  | MZ594699   | MZ594800   |
| D1-15 | IGHV1-2*04 | IGHD6-19*01     | IGHJ2*01 | CARVSIAGWYFDFLW          | IGKV3-20*01  | IGKJ1*01 | CQYRTF  | MZ594700   | MZ594801   |
| D1-16 | IGHV1-2*04 | IGHD3-10*01     | IGHJ6*02 | CASGGGGSGDYIYYGMDVW      | IGKV3-20*01  | IGKJ2*01 | CQYEF   | MZ594701   | MZ594802   |
| D1-17 | IGHV1-2*04 | IGHD2-8*01      | IGHJ4*02 | CASGPKGLDYW              | IGKV1D-33*01 | IGKJ3*01 | CQYGF   | MZ594702   | MZ594803   |
| D1-18 | IGHV1-2*04 | IGHD1-26*01     | IGHJ4*02 | CARVGSYDIYIYFDYW         | IGLV2-8*02   | IGLJ2*01 | CSYDALF | MZ594703   | MZ594804   |
| D1-19 | IGHV1-2*04 | IGHD6-25*01     | IGHJ3*02 | CARFSSGGGRNAPDIW         | IGLV2-8*02   | IGLJ2*01 | CSYALF  | MZ594704   | MZ594805   |
| D1-20 | IGHV1-2*04 | IGHD3-10*01     | IGHJ4*02 | CASRSGSSYIYETW           | IGLV2-14*02  | IGLJ1*01 | CSSEVVF | MZ594705   | MZ594806   |
| D2-01 | IGHV1-2*02 | IGHD5-12*01     | IGHJ4*02 | CARAVGSRFGYSGWKFDFYW     | IGKV3-20*01  | IGKJ5*01 | CQYGSF  | MZ594706   | MZ594807   |
| D2-02 | IGHV1-2*02 | IGHD3-10*01     | IGHJ5*02 | CARAVIEKLVFPELGRYWFDPW   | IGKV1-5*01   | IGKJ3*01 | CQYETF  | MZ594707   | MZ594808   |
| D2-03 | IGHV1-2*02 | IGHD5-12*01     | IGHJ4*02 | CARDKRPVATIESGLYLDYW     | IGKV1-5*01   | IGKJ4*01 | CQYNSF  | MZ594708   | MZ594809   |
| D2-04 | IGHV1-2*02 | IGHD6-13*01     | IGHJ4*02 | CARDWGVDSSSWPGFDFYW      | IGKV3-20*01  | IGKJ1*01 | CQYEF   | MZ594709   | MZ594810   |
| D2-05 | IGHV1-2*02 | IGHD3-10*01     | IGHJ4*02 | CAREPGLPEYGYW            | IGKV1-9*01   | IGKJ5*01 | CQQLSTF | MZ594710   | MZ594811   |
| D2-06 | IGHV1-2*02 | IGHD3-3*01      | IGHJ4*02 | CARGGVVDIYW              | IGKV3-20*01  | IGKJ5*01 | CQYGLF  | MZ594711   | MZ594812   |
| D2-07 | IGHV1-2*02 | IGHD6-19*01     | IGHJ4*02 | CARGRGRYDFMFLW           | IGKV1-5*01   | IGKJ4*01 | CQYDNF  | MZ594712   | MZ594813   |
| D2-08 | IGHV1-2*02 | IGHD6-19*01     | IGHJ4*02 | CARIPLYSSGYDYW           | IGKV1-12*01  | IGKJ3*01 | CQYNSF  | MZ594713   | MZ594814   |
| D2-09 | IGHV1-2*02 | IGHD3-16*01     | IGHJ2*01 | CARLSKGGFGGANWYFDFLW     | IGKV1D-33*01 | IGKJ4*01 | CQYDSF  | MZ594714   | MZ594815   |
| D2-10 | IGHV1-2*02 | IGHD3-10*01     | IGHJ4*02 | CARMQYIYSSGYSW           | IGKV4-1*01   | IGKJ3*01 | CQSETF  | MZ594715   | MZ594816   |
| D2-11 | IGHV1-2*02 | IGHD6-19*01     | IGHJ4*02 | CARVDSYRSGWIPDIYW        | IGKV1-5*01   | IGKJ3*01 | CQYNSF  | MZ594716   | MZ594817   |
| D2-12 | IGHV1-2*02 | IGHD3-22*01     | IGHJ4*02 | CARVGFYVDSYSSYIYW        | IGKV4-1*01   | IGKJ2*01 | CQYETF  | MZ594717   | MZ594818   |
| D2-13 | IGHV1-2*02 | IGHD5-24*01 ORF | IGHJ2*01 | CARVGGDGYKSYWYFDFLW      | IGKV3-20*01  | IGKJ1*01 | CQYETF  | MZ594718   | MZ594819   |
| D2-14 | IGHV1-2*02 | IGHD1-26*01     | IGHJ3*02 | CARVVGATTSNDNADFIDW      | IGKV1-5*01   | IGKJ1*01 | CQYNAF  | MZ594719   | MZ594820   |
| D2-15 | IGHV1-2*02 | IGHD4-17*01     | IGHJ4*02 | CARDYVDYWFDFLW           | IGKV1-5*01   | IGKJ4*01 | CQYRTF  | MZ594720   | MZ594821   |
| D2-16 | IGHV1-2*02 | IGHD6-13*01     | IGHJ3*02 | CAWQQLVNAFDFIDW          | IGKV1D-33*01 | IGKJ3*01 | CQYDF   | MZ594721   | MZ594822   |
| D2-17 | IGHV1-2*04 | IGHD3-22*01     | IGHJ3*02 | CARAGNYDSSGYRPAFDFIDW    | IGKV1-39*01  | IGKJ4*01 | CQSYTF  | MZ594722   | MZ594823   |
| D2-18 | IGHV1-2*04 | IGHD3-3*01      | IGHJ4*02 | CARASNYDFWSSGYTYW        | IGKV1-5*01   | IGKJ3*01 | CQHPETF | MZ594723   | MZ594824   |
| D2-19 | IGHV1-2*04 | IGHD4-17*01     | IGHJ2*01 | CARGDYDYLGHSDHAWYFDFLW   | IGKV3-20*01  | IGKJ2*03 | CQYEGF  | MZ594724   | MZ594825   |
| D2-20 | IGHV1-2*04 | IGHD1-26*01     | IGHJ4*02 | CARGSSGYDYW              | IGKV1-9*01   | IGKJ4*01 | CQQLNSF | MZ594725   | MZ594826   |
| D3-01 | IGHV1-2*02 | IGHD4-23*01 ORF | IGHJ4*02 | CARFYGGNSCFDYW           | IGKV1-12*01  | IGKJ4*01 | CQYNSF  | MZ594726   | MZ594827   |
| D3-02 | IGHV1-2*02 | IGHD3-22*01     | IGHJ3*02 | CAGNVVYDSSGYFVWAFDFIDW   | IGKV1-5*01   | IGKJ2*03 | CQYNSF  | MZ594727   | MZ594828   |
| D3-03 | IGHV1-2*02 | IGHD3-10*01     | IGHJ5*02 | CARATGGSSGYVDFDPW        | IGKV1-5*01   | IGKJ2*01 | CQYEFF  | MZ594728   | MZ594829   |
| D3-04 | IGHV1-2*02 | IGHD1-26*01     | IGHJ3*02 | CARGSGHGFDFIDW           | IGKV1-5*01   | IGKJ3*01 | CQSSTF  | MZ594729   | MZ594830   |
| D3-05 | IGHV1-2*02 | IGHD1-1*01      | IGHJ5*02 | CASNHRTRYKQQLSRLWRFDFDPW | IGKV1-5*01   | IGKJ2*02 | CQYQTF  | MZ594730   | MZ594831   |
| D3-06 | IGHV1-2*02 | IGHD6-6*01      | IGHJ2*01 | CARDRGGQLVWYFDFLW        | IGKV1D-33*01 | IGKJ2*01 | CQYFSF  | MZ594731   | MZ594832   |
| D3-07 | IGHV1-2*02 | IGHD2-15*01     | IGHJ4*02 | CARVGAASWYFDFYW          | IGKV1D-33*01 | IGKJ4*01 | CQYDNF  | MZ594732   | MZ594833   |
| D3-08 | IGHV1-2*02 | IGHD6-19*01     | IGHJ4*02 | CARYEQWLWVYFDFYW         | IGKV3-15*01  | IGKJ2*01 | CQYNSF  | MZ594733   | MZ594834   |
| D3-09 | IGHV1-2*02 | IGHD3-22*01     | IGHJ3*02 | CARAPYDSSGYVWAFDFIDW     | IGKV3-20*01  | IGKJ2*01 | CQYFSF  | MZ594734   | MZ594835   |
| D3-10 | IGHV1-2*02 | IGHD3-22*01     | IGHJ4*02 | CARVLGNYDSSGYIYGYW       | IGKV3-20*01  | IGKJ1*01 | CQYETF  | MZ594735   | MZ594836   |
| D3-11 | IGHV1-2*02 | IGHD1-26*01     | IGHJ2*01 | CARVPLNGIVGATTGWYFDFLW   | IGKV3-20*01  | IGKJ2*02 | CQSLGTF | MZ594736   | MZ594837   |
| D3-12 | IGHV1-2*02 | IGHD6-13*01     | IGHJ5*02 | CARVTAALFDFPW            | IGKV3-20*01  | IGKJ2*01 | CQHPYTF | MZ594737   | MZ594838   |
| D3-13 | IGHV1-2*02 | IGHD1-26*01     | IGHJ4*02 | CASRSNIVGAALGYW          | IGKV3-20*01  | IGKJ4*01 | CQYGSF  | MZ594738   | MZ594839   |
| D3-14 | IGHV1-2*02 | IGHD6-19*01     | IGHJ4*02 | CAREKGYSSGWSFDFYW        | IGKV4-1*01   | IGKJ4*01 | CQYQTF  | MZ594739   | MZ594840   |
| D3-15 | IGHV1-2*02 | IGHD6-6*01      | IGHJ4*02 | CARTQLAASWYFDFYW         | IGKV4-1*01   | IGKJ2*01 | CQLGNTF | MZ594740   | MZ594841   |
| D3-16 | IGHV1-2*04 | IGHD2-15*01     | IGHJ4*02 | CARARDCSGGSGYFYSW        | IGKV1-5*01   | IGKJ1*01 | CQYEF   | MZ594741   | MZ594842   |
| D3-17 | IGHV1-2*04 | IGHD6-19*01     | IGHJ4*02 | CARYIIVAGTFDFYW          | IGKV1-5*01   | IGKJ2*01 | CQYPTF  | MZ594742   | MZ594843   |
| D3-18 | IGHV1-2*04 | IGHD1-26*01     | IGHJ2*01 | CARGGGSYIYFDFLW          | IGKV3-20*01  | IGKJ4*01 | CQYSTF  | MZ594743   | MZ594844   |
| D3-19 | IGHV1-2*04 | IGHD3-10*01     | IGHJ4*02 | CARGSTLWFGELGKYFDFYW     | IGKV3-20*01  | IGKJ3*01 | CQYDTF  | MZ594744   | MZ594845   |
| D3-20 | IGHV1-2*02 | IGHD6-6*01      | IGHJ4*02 | CARDIASSSSSESWFDFYW      | IGLV4-60*02  | IGLJ2*01 | CQTWALF | MZ594745   | MZ594846   |
| D3-21 | IGHV1-2*02 | IGHD5-12*01     | IGHJ4*02 | CARGDSGYDFDYW            | IGLV2-14*02  | IGLJ3*02 | CSSYKVF | MZ594746   | MZ594847   |
| D3-22 | IGHV1-2*04 | IGHD4-23*01 ORF | IGHJ4*02 | CARDNPPDFDFDYW           | IGLV2-23*01  | IGLJ2*01 | CSSYVVF | MZ594747   | MZ594848   |

**Supplementary Table 1. VRC01-class naïve precursor B cell sequences identified using tetramers**



|       | IGHV       | IGHD           | IGHJ     | CDRH3                    | IGKV         | IGKJ     | CDRL3   | HC GenBank | LC GenBank |
|-------|------------|----------------|----------|--------------------------|--------------|----------|---------|------------|------------|
| D4-01 | IGHV1-2*02 | IGHD3-22*01    | IGHJ4*02 | CARAGRYDDSSGYQPFDIW      | IGKV3-20*01  | IGKJ3*01 | CQYQGSF | MZ594748   | MZ594849   |
| D4-02 | IGHV1-2*02 | IGHD3-16*01    | IGHJ4*02 | CARALFGGATGLGPFYFDYW     | IGKV1-5*01   | IGKJ1*01 | CQYETF  | MZ594749   | MZ594850   |
| D4-03 | IGHV1-2*02 | IGHD3-10*01    | IGHJ5*02 | CARDFRDGDITMVRGVIWTFDPW  | IGKV1-9*01   | IGKJ2*01 | CQLETF  | MZ594750   | MZ594851   |
| D4-04 | IGHV1-2*02 | IGHD6-13*01    | IGHJ4*02 | CARDLGIAGAFDIW           | IGKV3-20*01  | IGKJ5*01 | CQYNTF  | MZ594751   | MZ594852   |
| D4-05 | IGHV1-2*02 | IGHD3-10*01    | IGHJ2*01 | CARDPNVESDWYFDLW         | IGKV1-5*01   | IGKJ1*01 | CQYTF   | MZ594752   | MZ594853   |
| D4-06 | IGHV1-2*02 | IGHD3-10*01    | IGHJ1*01 | CAREDGSGTEYFQHW          | IGKV1-5*01   | IGKJ2*02 | CQYSTF  | MZ594753   | MZ594854   |
| D4-07 | IGHV1-2*02 | IGHD4-17*01    | IGHJ5*02 | CAREVRDDYGANGGWFDPW      | IGKV1-5*01   | IGKJ4*01 | CQHPGTF | MZ594754   | MZ594855   |
| D4-08 | IGHV1-2*04 | IGHD5-12*01    | IGHJ6*02 | CARGGYSYDENYYYYGMDVW     | IGKV1-5*01   | IGKJ1*01 | CQYETF  | MZ594755   | MZ594856   |
| D4-09 | IGHV1-2*02 | IGHD3-10*02    | IGHJ5*02 | CARGRLRSGGANGFDPW        | IGKV3-20*01  | IGKJ1*01 | CQYETF  | MZ594756   | MZ594857   |
| D4-10 | IGHV1-2*02 | IGHD1-26*01    | IGHJ4*02 | CARLYSGSYGGYFDYW         | IGKV3-20*01  | IGKJ2*01 | CQYALF  | MZ594757   | MZ594858   |
| D4-11 | IGHV1-2*02 | IGHD3-22*01    | IGHJ4*02 | CARPAYYDSSGYFDYW         | IGKV1-5*01   | IGKJ1*01 | CQSGAF  | MZ594758   | MZ594859   |
| D4-12 | IGHV1-2*02 | IGHD6-6*01     | IGHJ4*02 | CARPHIAARYYFDYW          | IGKV4-1*01   | IGKJ2*01 | CQYETF  | MZ594759   | MZ594860   |
| D4-13 | IGHV1-2*02 | IGHD3-16*01    | IGHJ5*02 | CARPLTFGGVMMRNWTFDPW     | IGKV1-5*01   | IGKJ1*01 | CQYTF   | MZ594760   | MZ594861   |
| D4-14 | IGHV1-2*02 | IGHD3-9*01     | IGHJ3*02 | CARPQDWSRAFDIW           | IGKV1-5*01   | IGKJ1*01 | CQSWTF  | MZ594761   | MZ594862   |
| D4-15 | IGHV1-2*02 | IGHD5-18*01    | IGHJ6*02 | CARRGYTLHYYYYYGMDVW      | IGKV3-11*01  | IGKJ3*01 | CQADTF  | MZ594762   | MZ594863   |
| D4-16 | IGHV1-2*02 | IGHD2-2*01     | IGHJ6*02 | CARVSSLPYYYYYGMDVW       | IGKV3-20*01  | IGKJ1*01 | CQYGT   | MZ594763   | MZ594864   |
| D4-17 | IGHV1-2*02 | IGHD3-22*01    | IGHJ4*02 | CARYWAARPDDSSGYIIDYW     | IGKV1-27*01  | IGKJ1*01 | CQNPPTF | MZ594764   | MZ594865   |
| D4-18 | IGHV1-2*02 | IGHD5-24*01ORF | IGHJ5*02 | CATTDGYNWTFDPW           | IGKV3-20*01  | IGKJ2*01 | CQWDTF  | MZ594765   | MZ594866   |
| D4-19 | IGHV1-2*02 | IGHD1-7*01     | IGHJ6*03 | CAVSAKLELRRYYYYMDVW      | IGKV3-15*01  | IGKJ2*01 | CQYETF  | MZ594766   | MZ594867   |
| D4-20 | IGHV1-2*02 | IGHD1-26*01    | IGHJ4*02 | CARDPVGATTHFDYW          | IGLV3-1*01   | IGLJ2*01 | CQAWVVF | MZ594767   | MZ594868   |
| D5-01 | IGHV1-2*02 | IGHD6-13*01    | IGHJ6*02 | CARAVAGSSWYRDYYYYGMDVW   | IGKV1-5*01   | IGKJ1*01 | CQHGAF  | MZ594768   | MZ594869   |
| D5-02 | IGHV1-2*02 | IGHD4-17*01    | IGHJ3*02 | CARDSTAYDAFDIW           | IGKV1-5*01   | IGKJ1*01 | CQHLETF | MZ594769   | MZ594870   |
| D5-03 | IGHV1-2*02 | IGHD3-22*01    | IGHJ3*02 | CARGVPYDSSGYWISIW        | IGKV3-15*01  | IGKJ1*01 | CQHGT   | MZ594770   | MZ594871   |
| D5-04 | IGHV1-2*02 | IGHD6-19*01    | IGHJ4*02 | CARESFLAVAGTTFDIW        | IGKV1-5*01   | IGKJ2*01 | CQHGT   | MZ594771   | MZ594872   |
| D5-05 | IGHV1-2*02 | IGHD3-10*01    | IGHJ6*02 | CARDRIITMVRGVIHSHYGGMDVW | IGKV1-5*01   | IGKJ1*01 | CQSGTF  | MZ594772   | MZ594873   |
| D5-06 | IGHV1-2*02 | IGHD6-19*01    | IGHJ4*02 | CARDPFSGWYGYW            | IGKV3-20*01  | IGKJ1*01 | CQSGTF  | MZ594773   | MZ594874   |
| D5-07 | IGHV1-2*02 | IGHD6-19*01    | IGHJ5*02 | CARDQEGYSSGWYGTW         | IGKV3-20*01  | IGKJ1*01 | CQYGF   | MZ594774   | MZ594875   |
| D6-01 | IGHV1-2*02 | IGHD5-12*01    | IGHJ2*01 | CARPTRRGYDYSWYFDLW       | IGKV1-39*01  | IGKJ3*01 | CQSWTF  | MZ594775   | MZ594876   |
| D6-02 | IGHV1-2*02 | IGHD3-22*01    | IGHJ4*02 | CARDPPYDSSGYRWGFDYW      | IGKV3-20*01  | IGKJ1*01 | CQYGT   | MZ594776   | MZ594877   |
| D6-03 | IGHV1-2*04 | IGHD2-15*01    | IGHJ3*02 | CARWTRNCSGGSCYLYRSGAFDIW | IGKV1-5*01   | IGKJ2*01 | CQHHHTF | MZ594777   | MZ594878   |
| D6-04 | IGHV1-2*04 | IGHD4-17*01    | IGHJ2*01 | CARTTGSSYWFYFDLW         | IGKV3-20*01  | IGKJ1*01 | CQYASF  | MZ594778   | MZ594879   |
| D6-05 | IGHV1-2*02 | IGHD4-11*01    | IGHJ2*01 | CARP IHDYSNYNPDWYFDLW    | IGLV3-1*01   | IGLJ1*01 | CQARNVF | MZ594779   | MZ594880   |
| D7-01 | IGHV1-2*02 | IGHD6-13*01    | IGHJ4*02 | CARDPPASYSWYDYW          | IGKV1D-33*01 | IGKJ3*01 | CQYDNF  | MZ594780   | MZ594881   |
| D7-02 | IGHV1-2*02 | IGHD6-13*01    | IGHJ4*01 | CARDRGHSSSTSFYDW         | IGKV1D-33*01 | IGKJ2*01 | CQYEAF  | MZ594781   | MZ594882   |
| D7-03 | IGHV1-2*02 | IGHD6-6*01     | IGHJ5*02 | CARSPYSSSFDPW            | IGKV3-20*01  | IGKJ2*03 | CQSDSF  | MZ594782   | MZ594883   |
| D7-04 | IGHV1-2*02 | IGHD6-19*01    | IGHJ4*02 | CARTDPSGWYDYW            | IGKV3-15*01  | IGKJ5*01 | CQFESF  | MZ594783   | MZ594884   |
| D7-05 | IGHV1-2*02 | IGHD4-17*01    | IGHJ4*02 | CARVTTDYGDYFPW           | IGKV3-20*01  | IGKJ3*01 | CQYETF  | MZ594784   | MZ594885   |
| D7-06 | IGHV1-2*02 | IGHD6-6*01     | IGHJ4*02 | CASSWTSSSPDNYW           | IGKV3-20*01  | IGKJ4*01 | CQSTVF  | MZ594785   | MZ594886   |
| D7-07 | IGHV1-2*02 | IGHD3-22*01    | IGHJ4*02 | CASSYDSSGYHFDYW          | IGKV1D-33*01 | IGKJ4*01 | CQYGYF  | MZ594786   | MZ594887   |

**Supplementary Table 2. VRC01-class naïve precursor B cell sequences identified using 60mers**

| <b>Cohort/Subgroup</b>                       | <b>N</b> | <b>IGHV1-2*02</b> | <b>IGHV1-2*04</b> | <b>IGHV1-2*05</b> | <b>IGHV1-2*06</b> |
|----------------------------------------------|----------|-------------------|-------------------|-------------------|-------------------|
| <b>African American<sup>1</sup></b>          | 5        | 0.6               | 0.4               | 0                 | 0                 |
| <b>Asian<sup>1</sup></b>                     | 17       | 0.47058824        | 0.47058824        | 0                 | 0.05882353        |
| <b>Caucasian<sup>1</sup></b>                 | 34       | 0.38235294        | 0.42647059        | 0                 | 0.19117647        |
| <b>Hawaiian/Pacific Islander<sup>1</sup></b> | 3        | 0.5               | 0.33333333        | 0                 | 0.16666667        |
| <b>Mixed ethnicity<sup>1</sup></b>           | 15       | 0.4               | 0.43333333        | 0.03333333        | 0.13333333        |
| <b>Unknown<sup>1</sup></b>                   | 1        | 0.5               | 0.5               | 0                 | 0                 |
| <b>ALL (RNAseq)<sup>1</sup></b>              | 75       | 0.42666667        | 0.43333333        | 0.00666667        | 0.13333333        |
| <b>ALL (RepSeq)</b>                          | 84       | 0.4047619         | 0.4702381         | 0.00595238        | 0.11904762        |

**Supplementary Table 3. Allele frequency of IGHV1-2 alleles inferred from RNAseq and RepSeq data**

<sup>1</sup>Subgroups from RNAseq data.
